# Supplementary material for: The chromatin landscape of Drosophila: comparisons between species, sexes, and chromosomes
Source: HighWire-hosted journal article supplement (doi:10.1101/gr.172155.114), 2014-05-19
Supplement: Supp_Legends.docx [file Supp_Legends.docx]

**Supplementary Figures**

**Figure S1.** Comparison of 7 state model generated from 3rd instar *D. melanogaster* larvae to 9 state model generated from S2 cells ([Kharchenko et al. 2011](#_ENREF_19)). a. Regions in different states from 7 state model partitioned by state from 9 state model. b. Regions in different states from 9 state model partitioned by state from 7 state model. In general, the dominant chromatin mark(s) of a state from the two models overlap. c. A model of prevalent chromatin states found in *D. melanogaster* and genomic coverage of chromatin states in *D. melanogaster* (the 9 state model from [Kharchenko et al. (2011](#_ENREF_19)) is shown for comparison)*.*

**Figure S2.** Comparison of 8 state model generated from 3rd instar *D. melanogaster* larvae to 9 state model generated from S2 cells ([Kharchenko et al. 2011](#_ENREF_19)). a. Regions in different states from 8 state model partitioned by state from 9 state model. b. Regions in different states from 9 state model partitioned by state from 8 state model. c. A model of prevalent chromatin states found in *D. melanogaster* and genomic coverage of chromatin states in *D. melanogaster* for the 8 state model. The 8 state model splits state 1 from the 9 state model (that also correspond to a single state in the 7 state model) into two separate states (state 1 and 4 of the 8 state model).

**Figure S3.** Overlap of states from 6 histone marks with the published 9 state model from [Kharchenko et al. (2011](#_ENREF_19)). a. Comparison of the 7 state model with the 9 state model. a. Comparison of the 8 state model with the 9 state model.

**Figure S4.** A 7-state model generated from *D. miranda* 3rd instar larvae ChIP-seq profiles.

**Figure S5.** Overview of normalization procedure to correct for unequal number of reads between samples and biased signal from different chromosomes.

**Figure S6.** Effect of normalization procedure to correct for biased signal from different chromosomes. Binarizing the X chromosomes and autosomes separately is generally more conservative in estimating differences in chromatin state between the sexes on the autosomes. Note that XL and XR do not change because they are binarized the same way in both methods.

**Figure S7.** Western blots and quantification of histone modifications in male (blue) and female (red) *D. miranda*. Quantification was calculated relative to actin signal for all four histone marks assayed (averaged across four replicates). For each histone modification, a 2-fold serial dilution was loaded to ensure quantification within the dynamic range; example blots for each mark are shown.

**Figure S8.** ChIP-qPCR of H3K9me2 and H4K16ac targets, and relative enrichment in male and female *D. miranda*, as described in Experimental Procedures. Significance was assayed using the Wilcoxon rank-sum test.

**Figure S9.** Direction and magnitude of sex-biased distribution of chromatin states annotated using published (v1) or replicate H3K9me2 and H4K16ac data for male and female *D. miranda* 3rd instar larvae; published data from the remaining 4 histone modifications were used in both the v1 and replicate annotations. The ratio of genomic regions in each state in females vs. males was calculated for each chromatin annotation.

**Figure S10.** Correlation between male and female samples for each histone modification. a. Fraction of the top 40% of female (red) or male (blue) peaks that are also called as peaks in the opposite sex. b. Correlation between enrichment intensities of 10kb windows for male and female samples for each histone modification. Spearman’s correlation coefficients are also shown.

**Figure S11.** Immunoprecipitation efficiency using published (v1) or replicate H3K9me2 and H4K16ac data for male and female *D. miranda* 3rd instar larvae. Efficiency was calculated as the fraction of all mappable reads that mapped within each chromatin state, normalized by the genome-wide frequency of each chromatin state.

**Figure S12.** Immunoprecipitation efficiency in *D. melanogaster*. Efficiency was calculated as described for Figure S11 except for mixed-sex *D. melanogaster* 3rd instar larvae (modENCODE data).

**Figure S13.** Distribution of tau values for *D. melanogaster* (black) and *D. pseudoobscura* (red, the sister species of *D. miranda*, which is used as a proxy to estimate tissue-specificity of *D. miranda* genes). Genes with tau values below 0.4 are considered housekeeping genes, and genes with tau values greater than 0.6 are considered tissue-specific. Genes with intermediate tau values are not considered in analyses of the effect of tissue specificity.

**Figure S14.** Chromatin states of housekeeping vs. tissue-specific genes in SL2 cells. Using the published 9-state chromatin model for S2 cells ([Kharchenko et al. 2011](#_ENREF_19)), we defined genes over 1kb by the chromatin state at their transcription start site. We then categorized genes expressed in S2 cells (FPKM>4, data from [Cherbas et al. (2011](#_ENREF_10))) as housekeeping (tau<0.4) or tissue-specific (tau>0.6) and looked at their chromatin states. We find an excess of genes in an active state (1-3) in housekeeping genes compared to tissue-specific genes (p<2.2e-16, Fisher’s exact test).

**Figure S15.** Coding sequence (CDS) and transposable element (TE) content of chromatin states. a. Proportion of each state that overlaps CDS in female and male *D. miranda* and *D. melanogaster*. b. Proportion of each state that overlaps TEs in female and male *D. miranda* and *D. melanogaster* (TE annotation derived from RepeatModeler).

**Figure S16.** Expression values, measured by log2(FPKM) of genes by chromatin state for (a) female larvae *D. miranda*, (b) male larvae *D. miranda*, and (c) mixed-sex larvae *D. melanogaster*. Significance values from Wilcoxon test.

**Figure S17.** Tissue specificity, measured by tau, of genes by chromatin state for (a) female *D. miranda*, (b) male *D. miranda*, and (c) *D. melanogaster*. Significance values from Wilcoxon test.

**Figure S18.** Sex-specific histone modification in *D. melanogaster*. a. We compared regions of H3K9me2 enrichment based on ChIP-chip data for male and female 3rd instar *D. melanogaster* larvae from modENCODE (accession numbers 3694 and 3772) and found that more of the assembled, euchromatic portion of the genome is enriched for H3K9me2 in females relative to males. b. We compared regions of H4K16ac enrichment on chromosomes X and 2L based on ChIP-chip data for male and female 3rd instar *D. melanogaster* larvae data from Gelbart and Kuroda (2009); (GEO accession number GSE14884) and found that while the X chromosome is highly male-biased in H4K16ac binding, chromosomes 2L is highly female-biased in H4K16ac binding. c. Normalized intensity values for H4K16ac ChIP-chip show higher values for males on the X, but higher values for females on chromosomes 2L. We defined bound regions as those with a normalized intensity greater than 1.

**Figure S19.** Transposable elements in heterochromatic regions. The genome was characterized for female and male *D. miranda* as either not heterochromatic (i.e. not in state 6), heterochromatic in one sex but not the other, or heterochromatic in both sexes. We then looked at the overlap between these regions and transposable elements (annotated from RepeatModeler).

**Figure S20.** Chromatin state of *D. miranda* genes in different expression categories. a. Sex-biased genes are defined by expression in both sexes with the biased sex having at least twice the expression level of the other sex. b. Based on tau values from *D. pseudoobscura*, housekeeping genes have tau<0.4, tissue-specific genes have tau>0.6, and head-specific genes have tau>0.6 with maximum expression observed in male or female head. Housekeeping, tissue-specific, and head-specific genes had to be expressed (FPKM>1) in at least one sex of *D. miranda* larvae to be included in the analysis. Gene numbers for each category are given in parentheses.

**Figure S21.** Tau values by expression category in *D. miranda*. Expressed unbiased genes are those expressed (FPKM>1, cutoff based on intergenic expression levels) in both sexes, with the ratio of expression between the two sexes less than 2. Sex-specific genes are those genes that are expressed in one sex (FPKM>1) but not expressed in the other (FPKM<1). Sex-biased genes are defined by expression in both sexes with the biased sex having at least twice the expression level of the other sex. For each category, tau values from *D. pseudoobscura* were analyzed. Statistical significance was assessed with Wilcoxon tests.

**Figure S22.** Chromosome-wide distribution of chromatin states. The fraction of each chromosome in each chromatin state for (a) *D. miranda* females, (b) *D. miranda* males, and (c) *D. melanogaster*.

**Figure S23.** Same as Figure 6 but *D. miranda* male and female data were computationally merged.

**Figure S24.** Conservation of chromatin states of orthologous genes in *D. miranda* and *D. melanogaster*. Overlap of orthologous genes by chromatin state (*D. melanogaster* top in gray, *D. miranda* males lower left in blue, *D. miranda* females lower left in pink).

**Figure S25.** Chromatin states of genes by tissue specificity in *D. melanogaster* and *D. miranda*, as calculated by tau. Housekeeping genes are those with tau values less than 0.4; tissue-specific genes are those with tau values greater than 0.6.

**Figure S26.** Conservation of chromatin state of orthologous housekeeping genes in *D. miranda* and *D. melanogaster*. Transitions of chromatin states between *D. melanogaster* and *D. miranda* females (top) and males (bottom). The solid background color indicates the number of genes in a given state in *D. melanogaster*, and the crosshatch color indicates transitions to a given state in *D. miranda*; solid regions indicate genes that are shared in the two species in a given state. Only genes with tau<0.4 in both species are considered.

**Figure S27.** Conservation of chromatin state of orthologous tissue-specific genes in *D. miranda* and *D. melanogaster*. Transitions of chromatin states between *D. melanogaster* and *D. miranda* females (top) and males (bottom). The solid background color indicates the number of genes in a given state in *D. melanogaster*, and the crosshatch color indicates transitions to a given state in *D. miranda*; solid regions indicate genes that are shared in the two species in a given state. Only genes with tau>0.6 in both species are considered.

**Figure S28.** Fraction of orthologous genes with a conserved chromatin state between *D. melanogaster* and *D. miranda* females (pink) and males (blue) by chromosome.

**Figure S29.** Chromatin states of genes with species-biased expression. *D. miranda* biased genes are expressed in both species, and both male and female *D. miranda* have at least twice the expression level of *D. melanogaster*. *D. melanogaster* biased genes are expressed in both species, and *D. melanogaster* expression values are at least twice as high as those of both male and female *D. miranda*. Only genes that are expressed in both male and female *D. miranda* are considered.

**Figure S30.** Tissue-specificity of genes in different chromatin categories. a. Tissue specificity, measured by tau and normalized to have the same median between species, in *D. melanogaster* (white) and *D. pseudoobscura* (gray) for genes categorized as active (states 1-3) in both *D. melanogaster* and *D. miranda* females, active in only *D. melanogaster* or *D. miranda* females, or repressed (states 5-7) in both *D. melanogaster* and *D. miranda* females. For each species, all differences in tau across chromatin categories are highly significant (p<3e-7, Wilcoxon test). b. Same as (a) but chromatin states compared between *D. melanogaster* and *D. miranda* males. For each species, all differences in tau across chromatin categories are highly significant (p<2e-10, Wilcoxon test).

**Figure S31.** Tissue-specificity of genes by expression pattern in *D. melanogaster* and *D. miranda*. Unbiased genes are expressed in both species (FPKM>1) and the ratio of expression between the two species is less than 2. Species-specific genes are those expressed in one species but not the other. Species-biased genes are those expressed in both species, but *D. melanogaster* have at least twice the expression level of both male and female *D. miranda* (*D. melanogaster* biased), or both male and female *D. miranda* have at least twice the expression level of *D. melanogaster* (*D. miranda* biased). Silent genes are those not expressed in either species. Only genes that are expressed in both male and female *D. miranda* are considered.

**Figure S32.** Same as Figure 7 but *D. miranda* male and female data were computationally merged.

Reference

Cherbas L, Willingham A, Zhang D, Yang L, Zou Y, Eads BD, Carlson JW,

Landolin JM, Kapranov P, Dumais J, et al. 2011. The transcriptional

diversity of 25 *Drosophila* cell lines. *Genome Res* **21:** 301–314.
